# Supplementary material for: Radiomics-Based Prediction of Future Portal Vein Tumor Infiltration in Patients with HCC—A Proof-of-Concept Study
Source: MDPI journal article supplement (doi:10.3390/cancers14246036), 2022-12-08
Supplement: s1 [file s1]

## Supplement List S1

Radiomics LASSO regression formula:

$$\begin{aligned} & -1.960515e+00 + \text{art\_HISTO\_Skewness} * 6.663120e-02 + \text{art\_SHAPE\_Sphericity} * (-1.417622e+01) + \\ & \text{art\_GLCM\_Correlation} * (-6.356373e-01) + \text{art\_GLRLM\_LRLGE} * 2.018372e+01 + \\ & \text{art\_NGLDM\_Coarseness} * 2.478649e+02 + \text{art\_NGLDM\_Contrast} * (-2.541552e+00) + \\ & \text{art\_GLZLM\_SZE} * 8.944418e+00 + \text{art\_GLZLM\_SZHGE} * (-2.510421e-04) + \\ & \text{art\_GLZLM\_LZHGE} * 3.579658e-07 + \text{ven\_CONVENTIONAL\_HUmax} * 8.360941e-04 + \\ & \text{ven\_CONVENTIONAL\_HUpeak.sphere.0.5mL} * 1.049836e-02 + \text{ven\_SHAPE\_Sphericity} * 5.628418e+00 \\ & + \text{ven\_GLCM\_Correlation} * 3.865242e-01 + \text{ven\_GLCM\_Entropy\_log2} * 3.462243e-02 + \\ & \text{ven\_GLZLM\_SZE} * 4.410919e+00 + \text{ven\_GLZLM\_SZLGE} * 2.678224e+02 + \\ & \text{ven\_GLZLM\_LZHGE} * 4.970378e-07 \end{aligned}$$
