# Supplementary material for: Radiomics-Based Prediction of Future Portal Vein Tumor Infiltration in Patients with HCC—A Proof-of-Concept Study
Source: MDPI journal article supplement (doi:10.3390/cancers14246036), 2022-12-08
Supplement: s1 [file s1]

Supplement Table S1

Radiomics features included in the analysis after dropping highly correlated features:

| Late arterial phase              | Portal venous phase                 |
|----------------------------------|-------------------------------------|
| CONVENTIONAL_HUmin               | CONVENTIONAL_HUmin                  |
| CONVENTIONAL_HUstd               | CONVENTIONAL_HUstd                  |
| CONVENTIONAL_HUmax               | CONVENTIONAL_HUmax                  |
| CONVENTIONAL_HUpeak.sphere.0.5mL | CONVENTIONAL_HUpeak.sphere.0.5mL    |
| CONVENTIONAL_HUpeak.sphere.1mL   | CONVENTIONAL_HUpeak.sphere.1mL      |
| HISTO_Skewness                   | HISTO_Skewness                      |
| HISTO_ExcessKurtosis             | HISTO_ExcessKurtosis                |
| SHAPE_Sphericity                 | HISTO_Energy...Uniformity.          |
| GLCM_Correlation                 | SHAPE_Sphericity                    |
| GLCM_Entropy_log2                | SHAPE_Compacity                     |
| GLCM_Dissimilarity               | GLCM_Energy...Angular.second.moment |
| GLRLM_LRLGE                      | GLCM_Correlation                    |
| GLRLM_RP                         | GLCM_Entropy_log2                   |
| NGLDM_Coarseness                 | GLCM_Dissimilarity                  |
| NGLDM_Contrast                   | GLRLM_LRLGE                         |
| GLZLM_SZE                        | NGLDM_Coarseness                    |
| GLZLM_SZLGE                      | NGLDM_Contrast                      |
| GLZLM_SZHGE                      | GLZLM_SZE                           |
| GLZLM_LZLGE                      | GLZLM_SZLGE                         |
| GLZLM_LZHGE                      | GLZLM_SZHGE                         |
| GLZLM_ZLNU                       | GLZLM_LZLGE                         |
| GLZLM_ZP                         | GLZLM_LZHGE                         |
|                                  | GLZLM_GLNU                          |
|                                  | GLZLM_ZLNU                          |
|                                  | GLZLM_ZP                            |
